# Supplementary material for: Increased Dietary Inflammatory Index Is Associated with Schizophrenia: Results of a Case–Control Study from Bahrain
Source: MDPI journal article supplement (doi:10.3390/nu11081867), 2019-08-11
Supplement: s1 [file s1]

## **Demographics**

### **Research ID#**

**Sex:** ☐Male ☐Female

**Age (years):** .....

**Education level:** ☐Illiterate ☐Reads and Write ☐Primary/Intermediate School level

☐Secondary School level ☐Diploma ☐Bachelor level ☐MSc./MBA/MA ☐Doctorate Level

**Occupation:** ☐Unemployed ☐Self-Employed Person ☐Employee ☐Civil Servant ☐University Student ☐Pensioner/Retired ☐Housewife

**Marital Status:** ☐Married/Engaged ☐Single ☐Divorced ☐Widow/er

**Income:** ☐≤250 BD ☐251-499 BD ☐500-999 BD ☐+1000BD

**Governorate:** ☐Capital ☐Northern ☐Muharraq ☐Southern

## **General Health**

**Measure**    Weight .....Kg and Height .....centimeter

### **Do you suffer from the following diseases?**

Diabetes mellitus    ☐Yes ☐No

Hypertension ☐Yes ☐No

Cardiovascular problems ☐Yes ☐No

Muscular & Joints problems ☐Yes ☐No

Epilepsy ☐Yes ☐No

### **Dehydration - Do you have the following symptoms? Over the past 7 days**

Chills/fever ☐Yes ☐No

Constipation ☐Yes ☐No

Diarrhea ☐Yes ☐No

Lack of Concentration ☐Yes ☐No

Lack of Energy ☐Yes ☐No

Gas or indigestion ☐Yes ☐No

Skin problems e.g. dry, allergies ☐Yes ☐No

Dull hair, split ends ☐Yes ☐No

Nails broken easily ☐Yes ☐No

Frequent Colds/Flus ☐Yes ☐No

Frequent Headaches ☐Yes ☐No

### **Psychiatric History**

**Diagnosis:** ☐Schizophrenia (Any type) ☐Bipolar Affective Dis. ☐Major Depression Dis.

**Time of Diagnosis:** ☐ <6 month ☐ 6-12 months ☐ 13-24 months ☐ ≥25 months

**Number of OPD Visits** (in the past 12 months): ☐0 ☐1 ☐2 ☐3 ☐4 ☐5 ☐6 ☐7 ☐8 ☐ ≥9

**Number of Admissions** (Since Diagnosis): ☐0 ☐1 ☐2 ☐3 ☐4 ☐5 ☐6 ☐7 ☐8 ☐ ≥9

### **Life Style**

#### **Physical Activity – IPAQ Based**

Think about all the physical activities that you did in the **last 7 days**. Think **only** about those physical activities that you did for **at least 10 minutes at a time**.

| <i>Activity Level</i>                                                                              | <i>Frequency (days per week)</i> | <i>Duration (minutes)</i> |
|----------------------------------------------------------------------------------------------------|----------------------------------|---------------------------|
| <b>Vigorous activities</b> e.g. heavy lifting, digging, aerobics, or fast bicycling                |                                  |                           |
| <b>Moderate activities</b> e.g. carrying light loads, bicycling at a regular pace or double tennis |                                  |                           |
| <b>Walking</b> (Low Intensity)                                                                     |                                  |                           |
| <b>Sitting</b> (Complete Rest) e.g. TV                                                             |                                  |                           |

#### **Work Pattern**

How many hours per day usually do you work? .....Hrs

What is your work pattern? ☐Regular (morning only) ☐Shifts (morning/noon/night)

What is the usual area of your work? ☐Indoors mainly ☐Outdoors mainly

#### **Sleeping pattern**

How many hours do you usually sleep per day?

☐Less than 4 Hrs ☐4-6 Hrs ☐7- 8 Hrs ☐More than 8 Hrs

#### **Do you usually smoke?**

☐No

☐Yes, please indicate what type (you tick more than one)?

☐Cigarettes ☐Shisha (Hooka) ☐Electronic Shisha ☐Mixed

#### **Food Intake**

How many main meals do you take per day?

☐Less than 3 meals/day ☐3 meals per day ☐More than 3 meals/day

| <b>Mark HOW OFTEN you consumed the following foods during the last month:</b><br><b>Caution, answer considering as portion the quantity that is entered in the parenthesis.</b><br><i>(t =times, g= gram, pcs =pieces, c = cup =240 ml)</i> |                          |                         |                        |                        |                     |                       |
|---------------------------------------------------------------------------------------------------------------------------------------------------------------------------------------------------------------------------------------------|--------------------------|-------------------------|------------------------|------------------------|---------------------|-----------------------|
|                                                                                                                                                                                                                                             | <b>Never/<br/>Rarely</b> | <b>1-3 t/<br/>month</b> | <b>1-2 t/<br/>week</b> | <b>3-6 t/<br/>week</b> | <b>1 t/<br/>day</b> | <b>≥ 2 t/<br/>day</b> |
| White “Lebanese/Arabic” bread (1 piece 30gr)                                                                                                                                                                                                |                          |                         |                        |                        |                     |                       |
| White toasted bread (2 pcs)                                                                                                                                                                                                                 |                          |                         |                        |                        |                     |                       |
| Brown “Lebanese/Arabic” bread (1 slice 30gr)                                                                                                                                                                                                |                          |                         |                        |                        |                     |                       |
| Brown toasted grain bread (2 pcs)                                                                                                                                                                                                           |                          |                         |                        |                        |                     |                       |
| Biscuits (2 pcs), rusks (1 pcs), cookies (2 pcs)                                                                                                                                                                                            |                          |                         |                        |                        |                     |                       |
| Cereals (1 cup), cereals bar (1 pcs)                                                                                                                                                                                                        |                          |                         |                        |                        |                     |                       |
| Beef (steak) (1p~150 grams)                                                                                                                                                                                                                 |                          |                         |                        |                        |                     |                       |
| Burgers (1 pc), meatballs (4 pcs), minced meat (1c)                                                                                                                                                                                         |                          |                         |                        |                        |                     |                       |
| Chicken (all types) (150 gr)                                                                                                                                                                                                                |                          |                         |                        |                        |                     |                       |
| Lamb, goat, deer, rabbit, lamb chops (150 grams)                                                                                                                                                                                            |                          |                         |                        |                        |                     |                       |
| Fish (approx. 150 g)                                                                                                                                                                                                                        |                          |                         |                        |                        |                     |                       |
| Seafood (octopus, squid, shrimp) (150 grams)                                                                                                                                                                                                |                          |                         |                        |                        |                     |                       |
| Lentils, beans, chickpeas (1 c) (1 dish = 2 cups)                                                                                                                                                                                           |                          |                         |                        |                        |                     |                       |
| Fresh soup, (1 portion=250ml)                                                                                                                                                                                                               |                          |                         |                        |                        |                     |                       |
| Soup with pasta (e.g. noodles) (1 portion=250ml)                                                                                                                                                                                            |                          |                         |                        |                        |                     |                       |
| Rice, (1 cup, 1 medium plate)                                                                                                                                                                                                               |                          |                         |                        |                        |                     |                       |
| Boiled potatoes, mashed potatoes (1 medium)                                                                                                                                                                                                 |                          |                         |                        |                        |                     |                       |
| French fries (1 portion)                                                                                                                                                                                                                    |                          |                         |                        |                        |                     |                       |
| Fresh Vegetables (any kind)                                                                                                                                                                                                                 |                          |                         |                        |                        |                     |                       |
| Fresh Fruits (any kind)                                                                                                                                                                                                                     |                          |                         |                        |                        |                     |                       |
| Dried fruits (¼ cup)                                                                                                                                                                                                                        |                          |                         |                        |                        |                     |                       |
| Dried nuts, nuts (¼ cup)                                                                                                                                                                                                                    |                          |                         |                        |                        |                     |                       |
| Yoghurt complete or light (1 tub)                                                                                                                                                                                                           |                          |                         |                        |                        |                     |                       |
| Cream cheese “Glasses” (25 gr)                                                                                                                                                                                                              |                          |                         |                        |                        |                     |                       |
| Feta, white cheese, hard cheese (25 gr)                                                                                                                                                                                                     |                          |                         |                        |                        |                     |                       |
| Egg (boiled, fried, omelet) (1 pcs)                                                                                                                                                                                                         |                          |                         |                        |                        |                     |                       |
| Pies (ex. Cheese pie, spinach pie) (1 portion)                                                                                                                                                                                              |                          |                         |                        |                        |                     |                       |
| Ice cream, milk shake, pudding, rice pudding (1 pcs)                                                                                                                                                                                        |                          |                         |                        |                        |                     |                       |
| Honey, jam (1 teaspoon)                                                                                                                                                                                                                     |                          |                         |                        |                        |                     |                       |
| Olives (10 small /5 large)                                                                                                                                                                                                                  |                          |                         |                        |                        |                     |                       |
| Chocolate (all types) (1 medium = 60 gr)                                                                                                                                                                                                    |                          |                         |                        |                        |                     |                       |
| Chips packs, popcorn (1 bag =70 gr)                                                                                                                                                                                                         |                          |                         |                        |                        |                     |                       |

### Fluid Intake

How many water glasses (water bottles) do you usually take per day (24 Hours)?

☐None ☐1 ☐2 ☐3 ☐4 ☐5 ☐6 ☐7 ☐8 ☐9 ☐10 ☐more than 10

### Do you drink water overnight?

☐Never/Rarely ☐1-2 t/week ☐3-6 t/week ☐1-2 t/ day ☐3-4 t/day ☐ >5 t/day

### What kind of water do you usually take at home?

☐Tap water ☐Barreled water ☐Bottled water ☐Filtrated water

| Mark HOW OFTEN you consumed the following fluids during the <u>last month</u><br>Caution, answer considering as portion the quantity that is entered in the parenthesis |                  |                |                |               |               |              |
|-------------------------------------------------------------------------------------------------------------------------------------------------------------------------|------------------|----------------|----------------|---------------|---------------|--------------|
|                                                                                                                                                                         | Never/<br>Rarely | 1-2 t/<br>week | 3-6 t/<br>week | 1-2 t/<br>day | 3-4 t/<br>day | >5 t/<br>day |
| Fruit juice (1 glass or 1 small juice pack)                                                                                                                             |                  |                |                |               |               |              |
| Soft drinks, (1 can)                                                                                                                                                    |                  |                |                |               |               |              |
| Milk, milk shake (1 glass)                                                                                                                                              |                  |                |                |               |               |              |
| Coffee in a cup (e.g. Americano, Espresso)                                                                                                                              |                  |                |                |               |               |              |
| Arabic Coffee                                                                                                                                                           |                  |                |                |               |               |              |
| Tea, other herbal teas (e.g. chamomile, peppermint)<br>(1 cup)                                                                                                          |                  |                |                |               |               |              |
| Isotonic/energy drinks (1 glass)                                                                                                                                        |                  |                |                |               |               |              |
| Alcoholic drinks (wine, beer, whisky, vodka, (1 unit)                                                                                                                   |                  |                |                |               |               |              |

### Elimination of body fluids

The quantity of your body sweat expulsion during exercise from 1 (minimum) until the 10 (maximum) corresponds to:

☐1 ☐2 ☐3 ☐4 ☐5 ☐6 ☐7 ☐8 ☐9 ☐10

The quantity of your body sweat expulsion in regular conditions from 1 (minimum) until the 10 (maximum) corresponds to:

☐1 ☐2 ☐3 ☐4 ☐5 ☐6 ☐7 ☐8 ☐9 ☐10

The expulsion of urine from your body corresponds to:

☐1t/day ☐2-4t/day ☐5-7t/day ☐8-10t/day ☐more than 10t/day

The expulsion of faeces from your body corresponds to:

☐≥1t/day ☐5-6t/ week ☐3-4t/ week ☐1-2t/ week ☐1t/10days

**Supplementary Table S1.** Characteristics of control participants across the quartiles of energy adjusted Dietary Inflammatory Index (E-DII).

| Characteristic                                            | Quartile 1        | Quartile 2        | Quartile 3        | Quartile 4        |
|-----------------------------------------------------------|-------------------|-------------------|-------------------|-------------------|
| Age (years): Mean $\pm$ SD                                | 45.25 $\pm$ 13.57 | 42.17 $\pm$ 14.21 | 36.48 $\pm$ 10.75 | 38.17 $\pm$ 11.15 |
| Body mass index (BMI) (Kg/m <sup>2</sup> ): Mean $\pm$ SD | 27.54 $\pm$ 5.04  | 28.53 $\pm$ 7.19  | 25.38 $\pm$ 4.65  | 29.69 $\pm$ 8.04  |
| Overweight (%)                                            | 35.89             | 38.23             | 40                | 34.78             |
| Obese (%)                                                 | 28.21             | 29.63             | 16.67             | 39.13             |
| Education (%)                                             |                   |                   |                   |                   |
| • Primary                                                 | 16.7              | 20                | 6.7               | 0                 |
| • Secondary                                               | 23.3              | 26.7              | 33.3              | 36.7              |
| • Tertiary                                                | 60                | 53.3              | 60                | 63.3              |
| Job (%)                                                   |                   |                   |                   |                   |
| • Unemployed                                              | 3.3               | 0                 | 0                 | 0                 |
| • Employed/Student                                        | 66.7              | 83.3              | 93.3              | 96.7              |
| • Retired                                                 | 30                | 16.7              | 6.7               | 3.3               |
| Social Status (%)                                         |                   |                   |                   |                   |
| • Married/Engaged                                         | 80                | 76.7              | 73.3              | 86.7              |
| • Single                                                  | 10                | 13.3              | 23.3              | 10                |
| • Divorced                                                | 0                 | 6.7               | 3.3               | 3.3               |
| • Widow/er                                                | 10                | 3.3               | 0                 | 0                 |
| Physical activity (%):                                    |                   |                   |                   |                   |
| • Inactive                                                | 40                | 40                | 30                | 50                |
| • Active                                                  | 60                | 60                | 70                | 50                |
| Smoking (%)                                               |                   |                   |                   |                   |
| • Nonsmoker                                               | 90                | 93.3              | 76.7              | 83.3              |
| • Smoker                                                  | 10                | 6.7               | 23.3              | 16.7              |
| Smoking Type (%)                                          |                   |                   |                   |                   |
| • Cigarette                                               | 100               | 50                | 57.1              | 60                |
| • Water Pipe                                              | 0                 | 0                 | 14.3              | 20                |
| • Mixed                                                   | 0                 | 0                 | 14.3              | 0                 |
| • Mixed                                                   | 0                 | 50                | 14.3              | 20                |
| Medical Comorbidity (%)                                   |                   |                   |                   |                   |
| • Type 2 Diabetes mellitus                                | 10                | 13.3              | 10                | 6.7               |
| • Hypertension                                            | 16.7              | 20                | 10                | 10                |
| • Cardiovascular disease                                  | 0                 | 10                | 10                | 3.3               |
| • Muscular & joints disease                               | 30                | 30                | 16.7              | 16.7              |
| Adequate Sleep (%)                                        | 93.3              | 90                | 93.1              | 93.3              |

**Supplementary Table S2.** Distribution of nutrients and dietary factors across quartiles of energy adjusted Dietary Inflammatory Index (E-DII) for controls.

| <b>Nutrient or<br/>Dietary<br/>Factor/Day (Mean<br/>± SD)</b> | <b>Quartile 1</b> | <b>Quartile 2</b> | <b>Quartile 3</b> | <b>Quartile 4</b> |
|---------------------------------------------------------------|-------------------|-------------------|-------------------|-------------------|
| Energy (Kcal)                                                 | 2024.75±579.46    | 2174.98±638.32    | 2636.62±1018.52   | 2911.19±1032.99   |
| Protein (g)                                                   | 87.79±25.77       | 99.37±40.97       | 114.54±51.48      | 131.73±52.67      |
| Carbohydrates (g)                                             | 283.03±83.06      | 296.63±91.57      | 339.46±125.85     | 353.93±137.14     |
| Fibers (g)                                                    | 27.35±16.19       | 20.22±7.67        | 26.07±15.11       | 23.8±11.93        |
| Fat (g)                                                       | 64.99±21.89       | 70.33±28.4        | 97.39±42.35       | 113.58±41.69      |
| SFA (g)                                                       | 22.37±6.33        | 25.7±9.7          | 36.2±15.82        | 41.61±16.82       |
| MUFA (g)                                                      | 9.13±2.63         | 9.83±4.8          | 10.56±6.27        | 14.08±9.19        |
| PUFA (g)                                                      | 10.1±4.17         | 10.44±6.87        | 10.59±5.68        | 12.83±6.57        |
| Trans fats (g)                                                | 0.29±0.15         | 0.44±0.28         | 0.39±0.29         | 0.55±0.54         |
| Cholesterol (mg)                                              | 327±145.18        | 420.3±227.06      | 529.62±395.93     | 605.3±318.99      |
| Omega-3 (g)                                                   | 0.69±0.26         | 0.76±0.35         | 0.67±0.4          | 0.8±0.42          |
| Omega-6 (g)                                                   | 8.18±3.16         | 8.71±5.61         | 8.57±4.61         | 10.49±5.57        |
| Thiamin (mg)                                                  | 1.36±0.47         | 1.29±0.47         | 1.3±0.7           | 1.39±0.45         |
| Riboflavin (mg)                                               | 1.39±0.53         | 1.54±0.74         | 1.49±0.74         | 1.4±0.6           |
| Niacin (mg)                                                   | 18.12±7.89        | 18.71±8.49        | 20.55±10.8        | 20.11±8.74        |
| Vitamin B <sub>6</sub> (mg)                                   | 1.13±0.54         | 1.12±0.7          | 1.01±0.6          | 0.97±0.44         |
| Vitamin B <sub>12</sub> (µg)                                  | 2.91±1.54         | 3.49±2.25         | 2.96±2.21         | 3.39±2.23         |
| Vitamin C (mg)                                                | 92.06±34.12       | 76.04±30.73       | 87.61±35.55       | 86.58±40.05       |
| Vitamin D (IU)                                                | 94.04±55.85       | 110.03±76         | 81.75±59.13       | 62.4±75.3         |
| Vitamin E (mg)                                                | 2.34±0.9          | 2.33±1.07         | 2.78±1.6          | 3.28±2.13         |
| Folic Acid (µg)                                               | 5315.05±1915.16   | 4394.31±1686.85   | 4802.14±1982.45   | 5065.32±2373.3    |
| Vitamin A (IU)                                                | 2072.71±840.09    | 1567.65±760.28    | 1695.51±717.28    | 1766.35±945.72    |
| β-carotene (µg)                                               | 485.68±285.73     | 377.67±146.2      | 420.45±261.42     | 360.68±166.38     |
| Iron (mg)                                                     | 16.28±6.92        | 14.83±6.15        | 15.66±8.29        | 16.27±5.92        |
| Magnesium (mg)                                                | 254.56±114.86     | 223.21±98.74      | 270.56±145.85     | 232.56±104.31     |
| Selenium (µg)                                                 | 57.52±19.8        | 56.94±14.24       | 55.54±29.88       | 57.9±22.92        |
| Zinc (mg)                                                     | 5.62±2.19         | 4.66±1.96         | 5.41±3.46         | 5.54±3.2          |
| Alcohol (g)                                                   | 0±0               | 0±0               | 0±0               | 0±0               |
| Caffeine (mg)                                                 | 210.94±295.64     | 237.01±231.54     | 324.73±307.88     | 226.16±237.24     |
